# Supplementary material
Source: ML conference proceedings conference paper supplement (https://openreview.net/forum?id=HeZlJPLoqgq)
Supplement: supplementary_material [file attachment]

~~—~~ 2 cheap tickets    —▲— 4 cheap tickets    —●— 7 cheap tickets
