# Supplementary material
Source: ML conference proceedings conference paper supplement (https://openreview.net/forum?id=HeZlJPLoqgq)

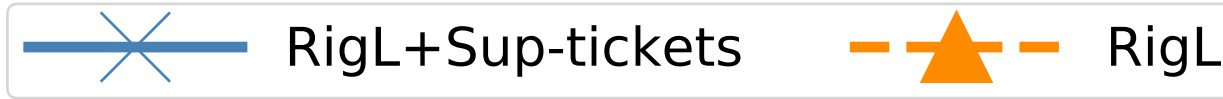

Supplement: supplementary_material [file attachment]

# ResNet-50 (CIFAR-10)

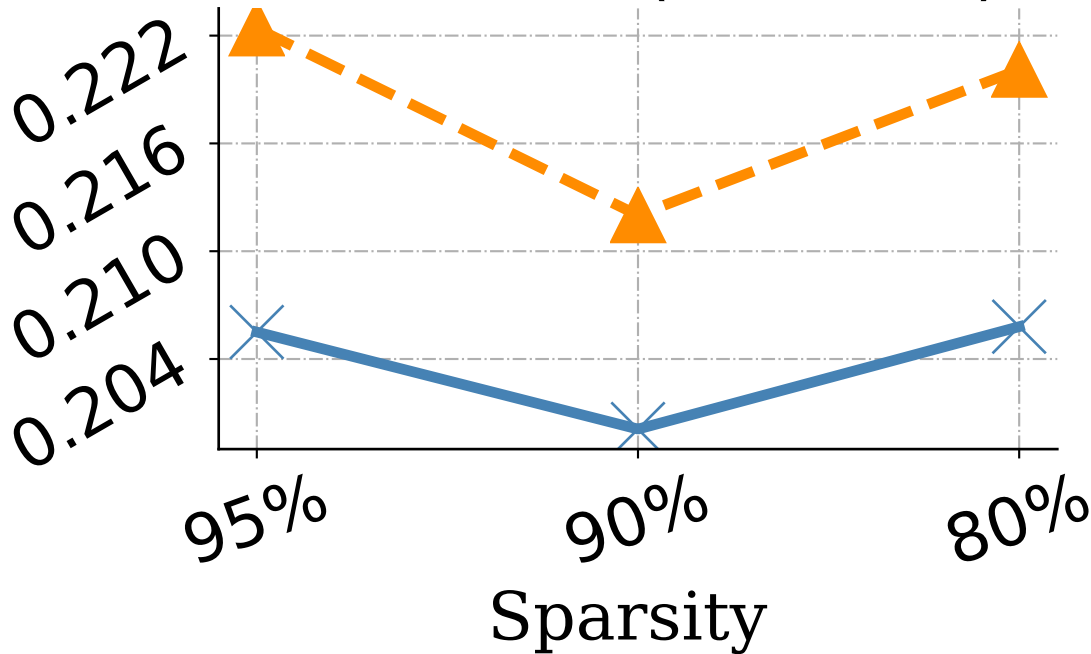

Supplement: supplementary_material [file attachment]

# VGG-16 (CIFAR-10)

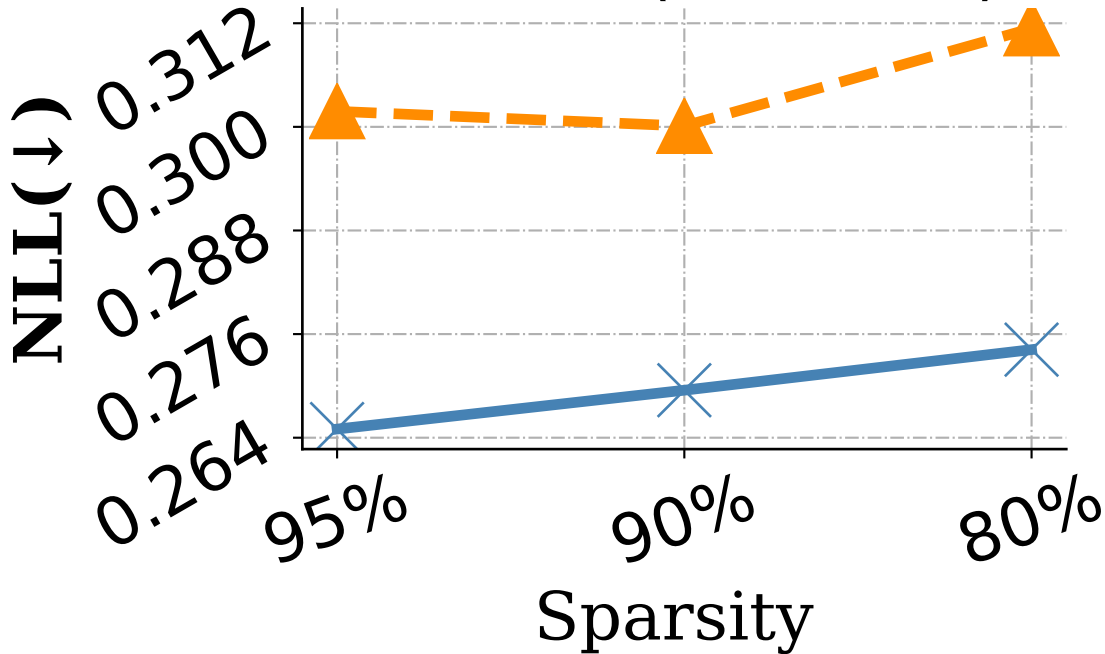

Supplement: supplementary_material [file attachment]

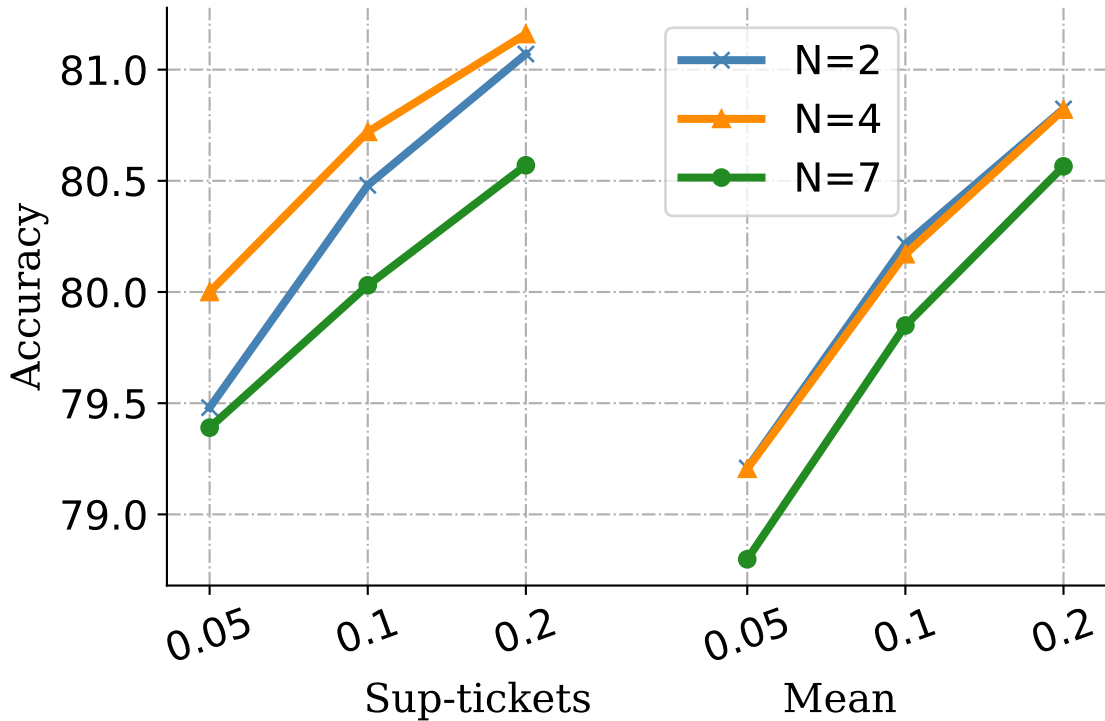

Supplement: supplementary_material [file attachment]

# VGG-16 (CIFAR-10)

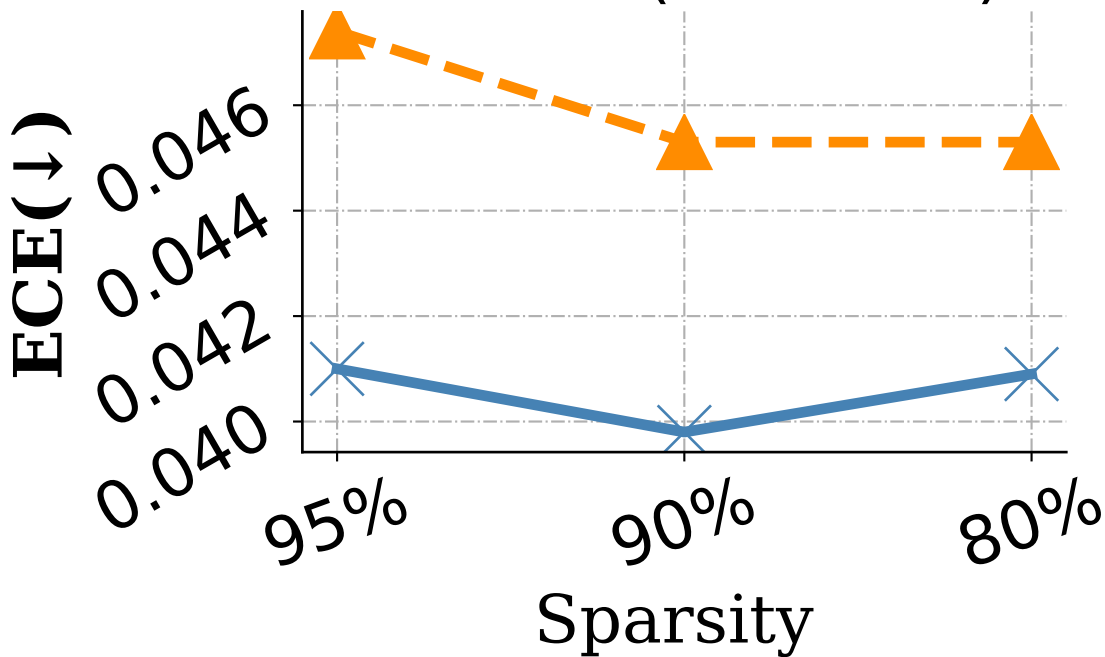

Supplement: supplementary_material [file attachment]

# VGG-16 (CIFAR-100)

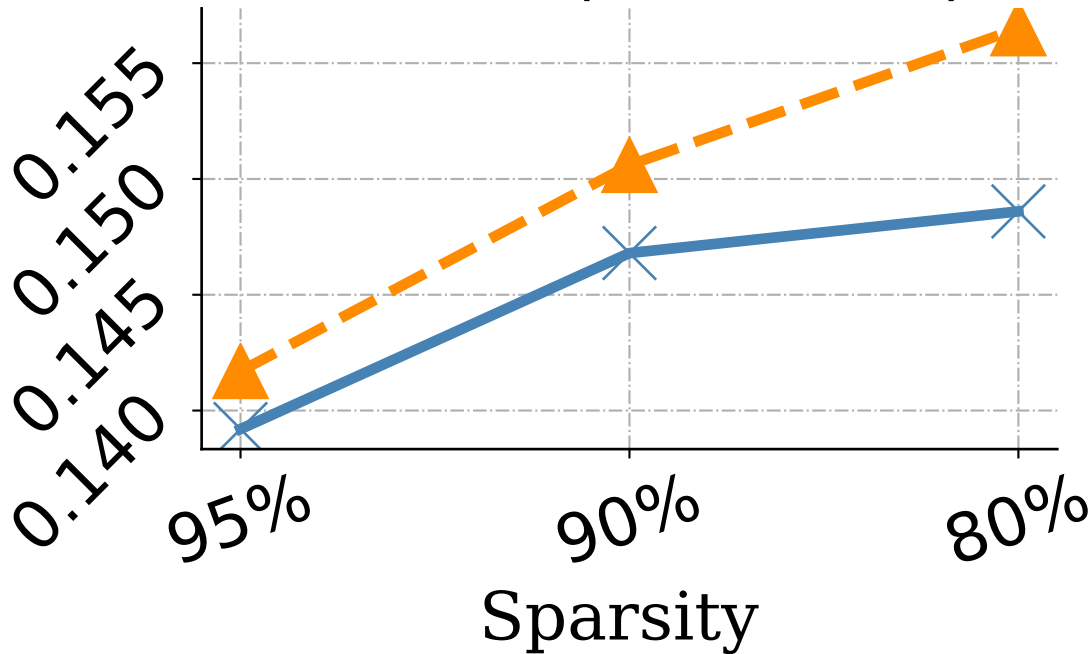

Supplement: supplementary_material [file attachment]

ResNet-50 (CIFAR-100)

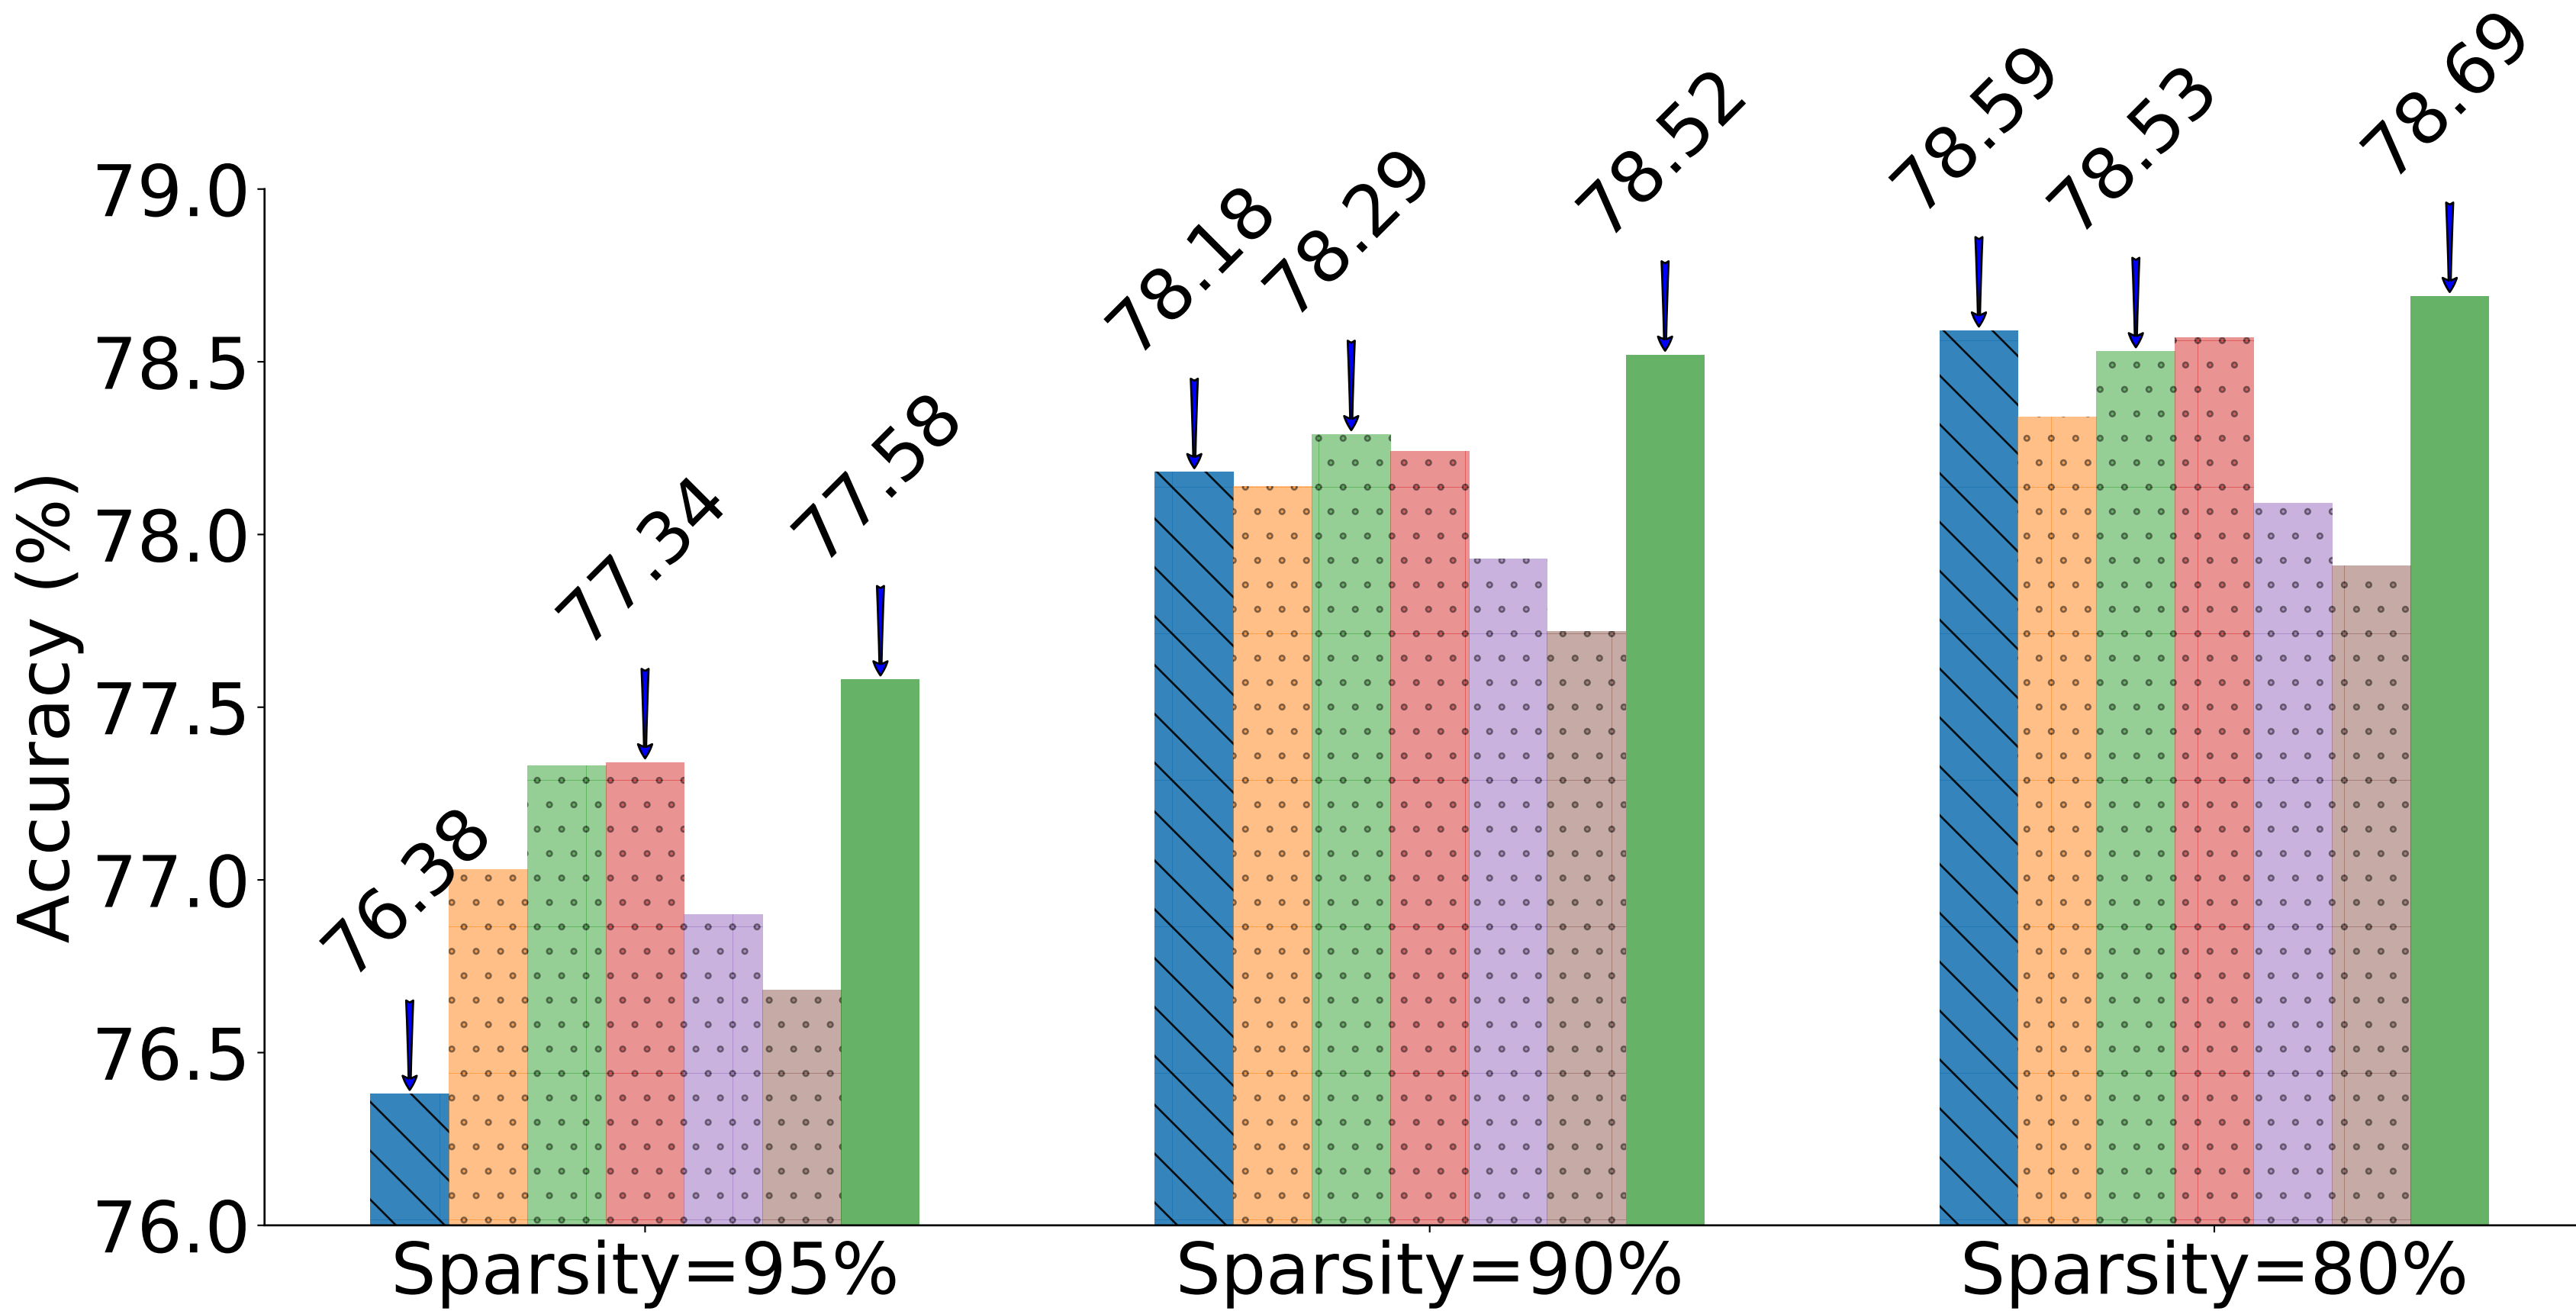

VGG-16 (CIFAR-100)

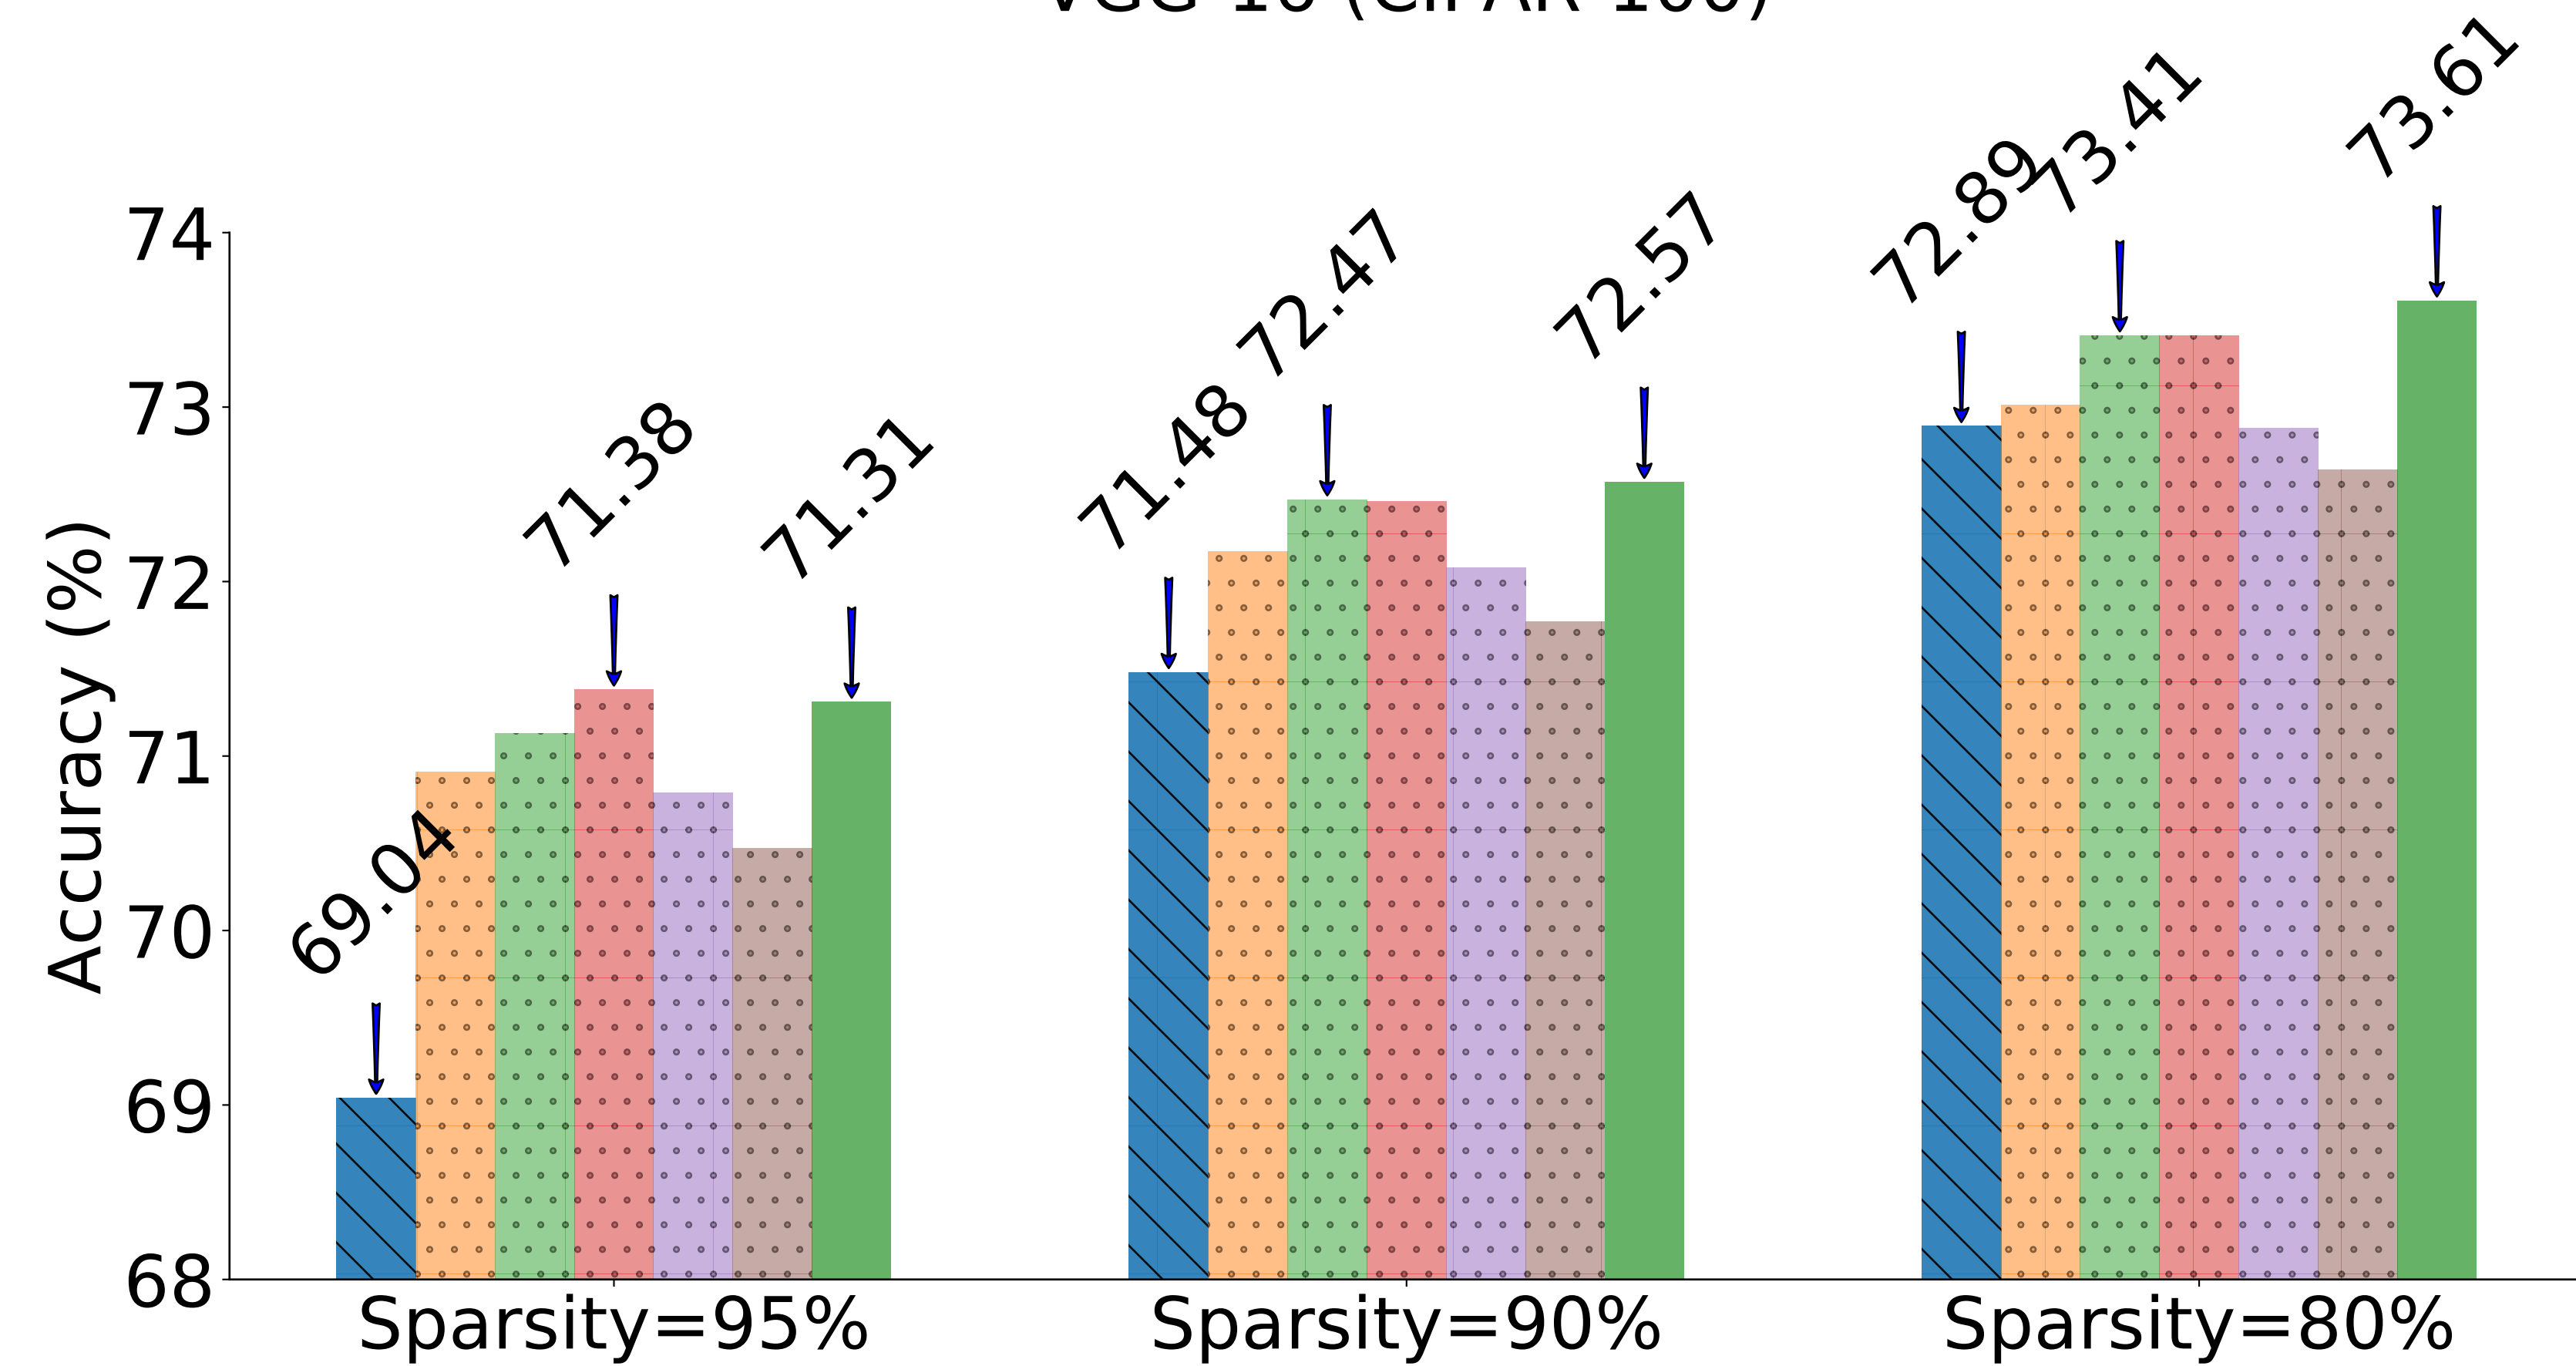

Supplement: supplementary_material [file attachment]

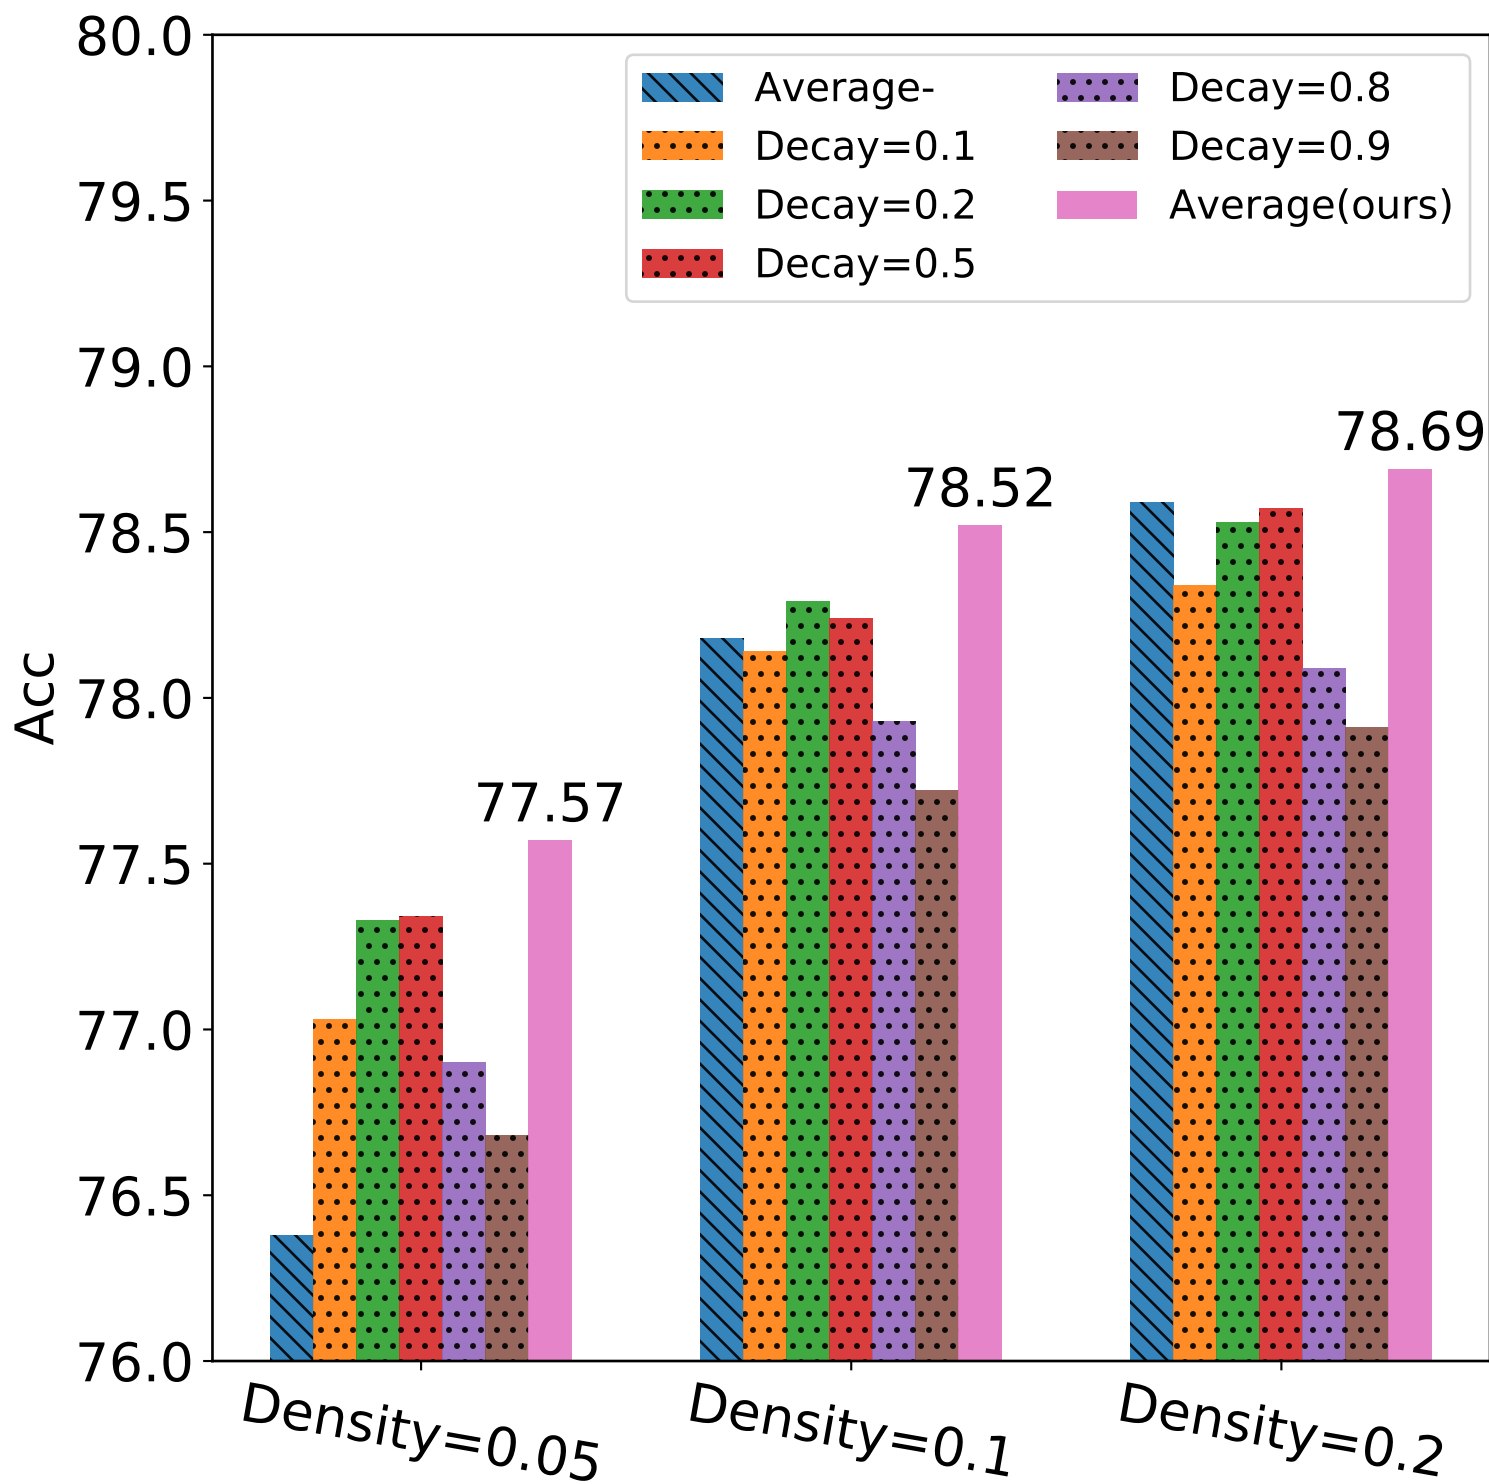

Supplement: supplementary_material [file attachment]

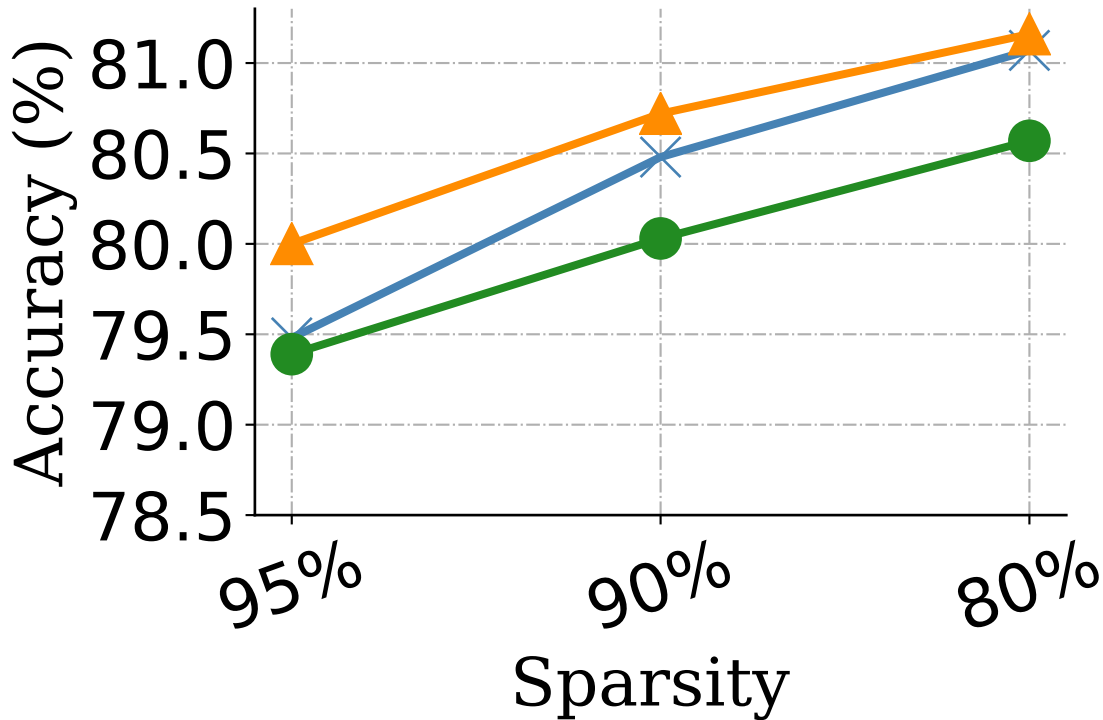

Supplement: supplementary_material [file attachment]

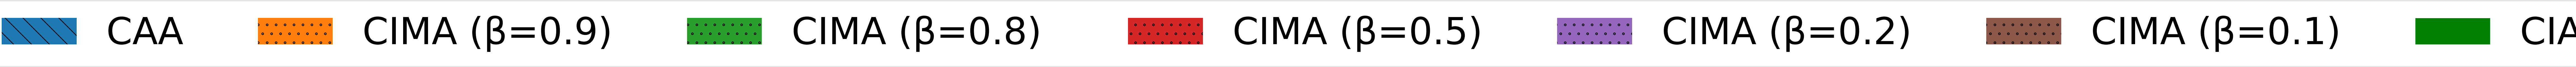

Supplement: supplementary_material [file attachment]

# ResNet-50 (CIFAR-100)

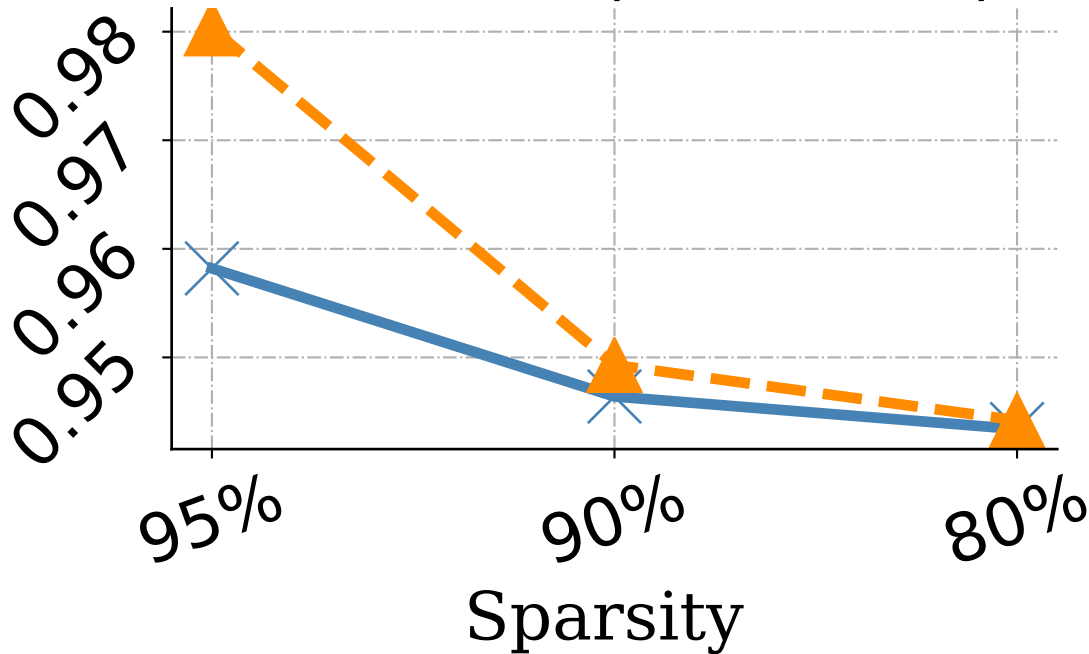

Supplement: supplementary_material [file attachment]

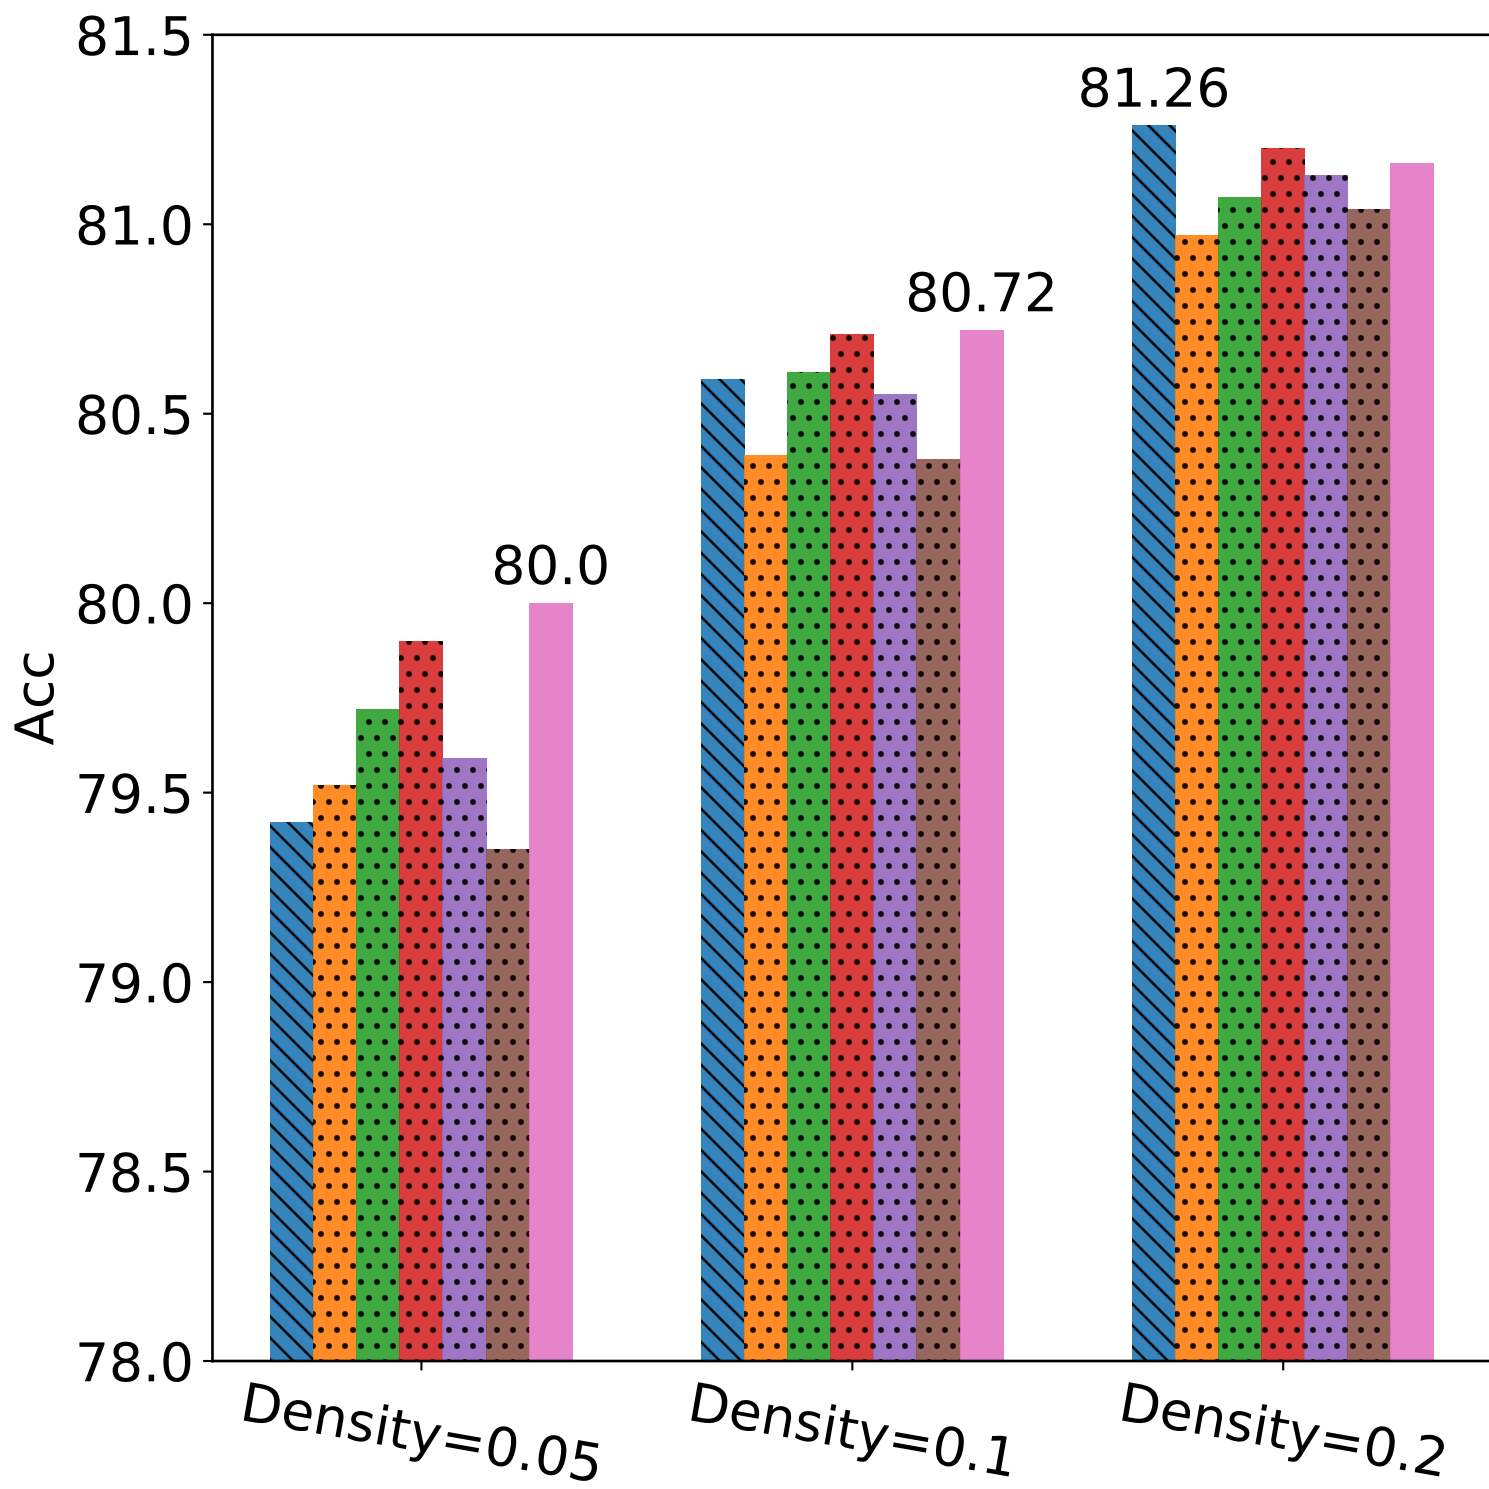

Supplement: supplementary_material [file attachment]

# ResNet-50 (CIFAR-10)

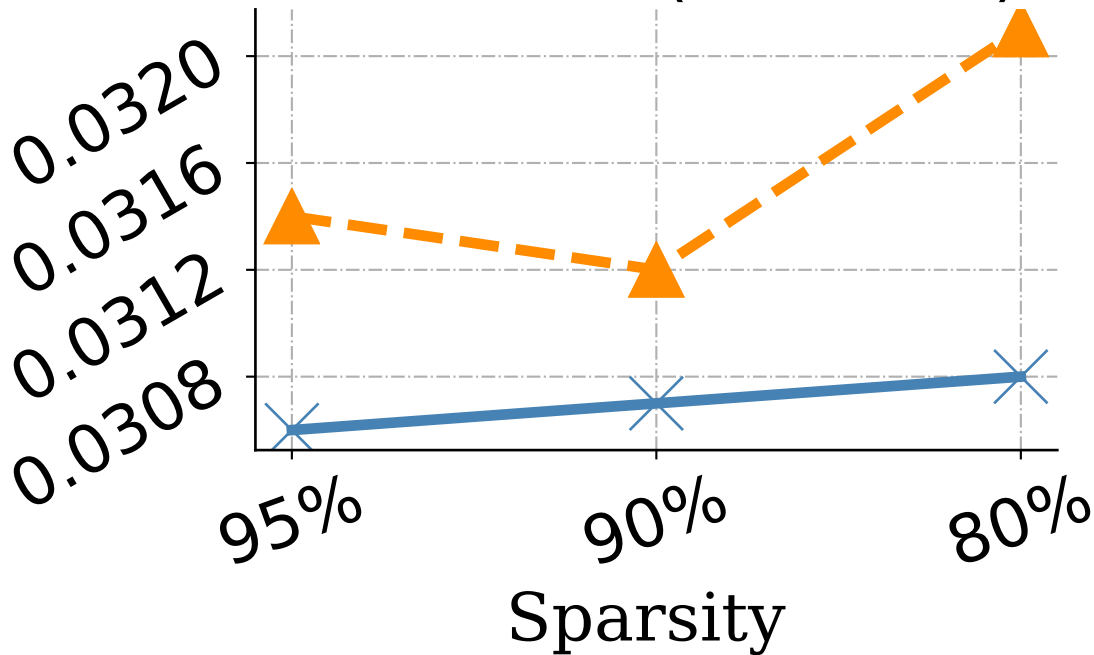

Supplement: supplementary_material [file attachment]

# ResNet-50 (CIFAR-100)

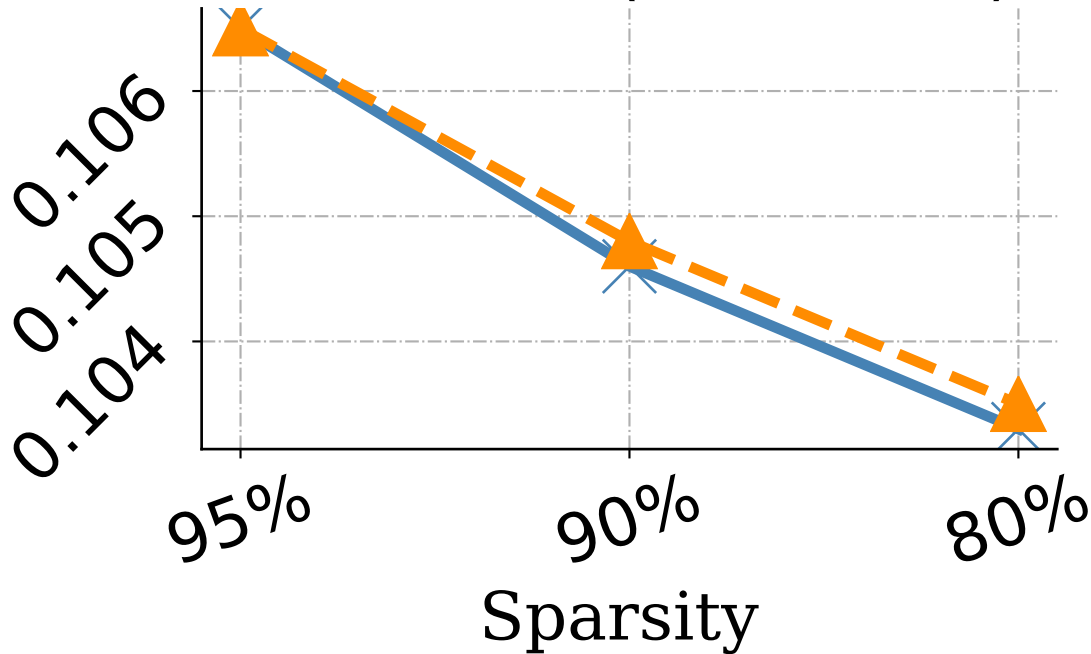

Supplement: supplementary_material [file attachment]

# SWA

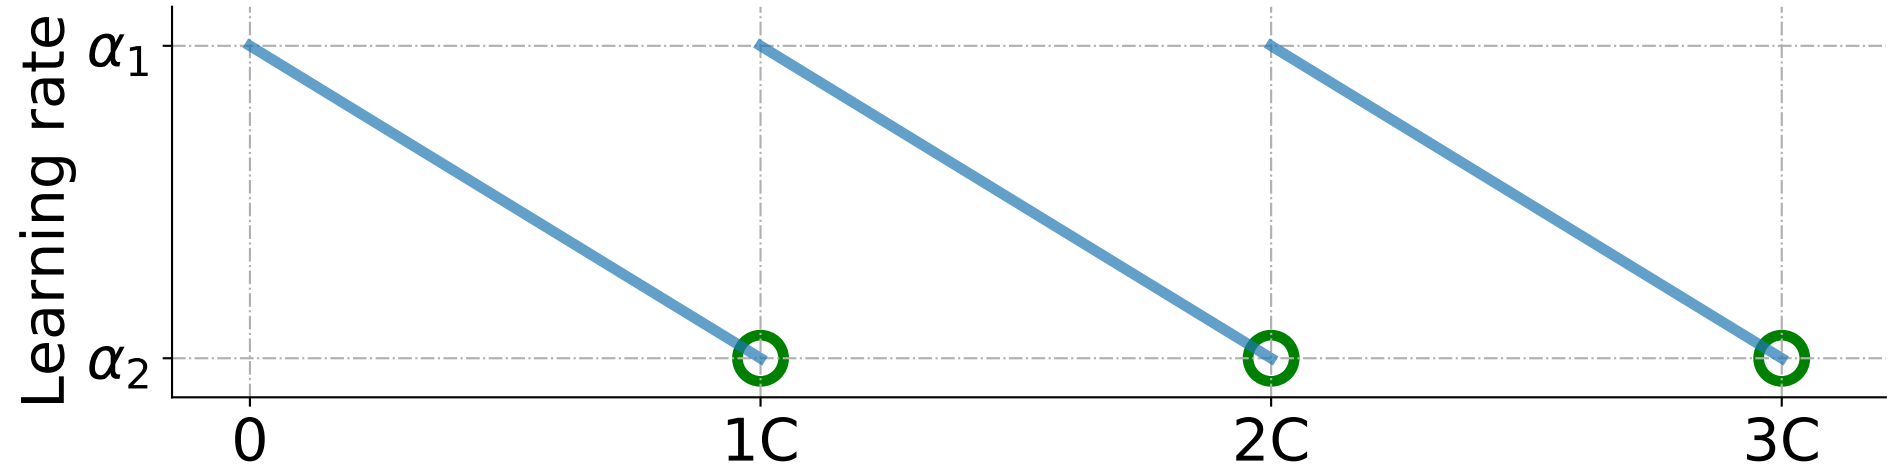

Supplement: supplementary_material [file attachment]

# VGG-16 (CIFAR-100)

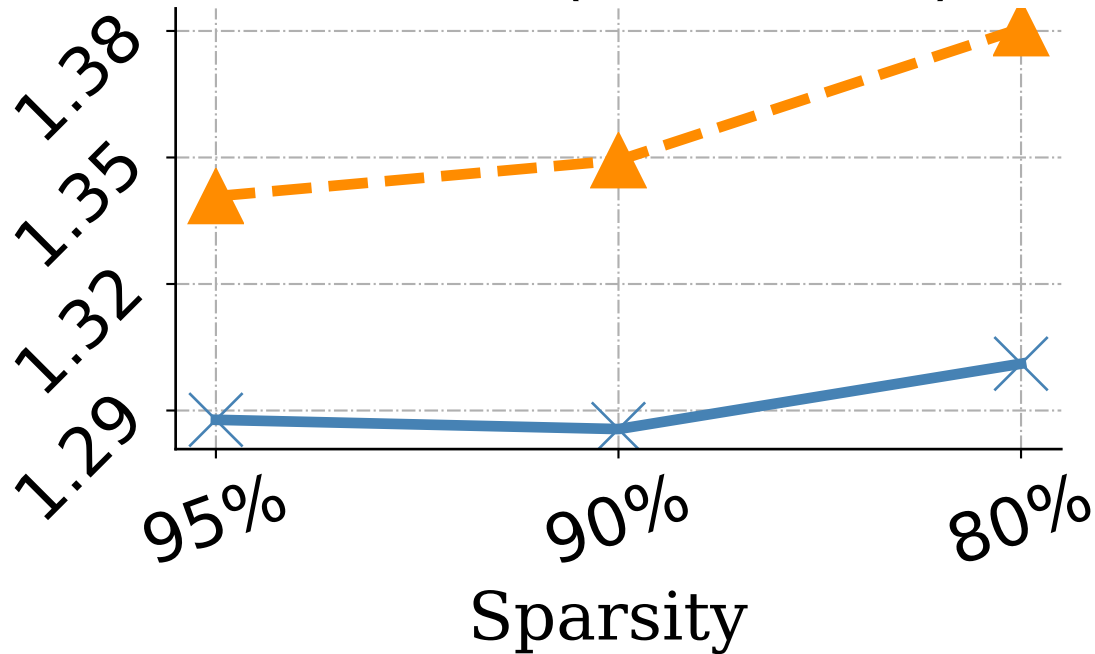

Supplement: supplementary_material [file attachment]

# Sup – tickets

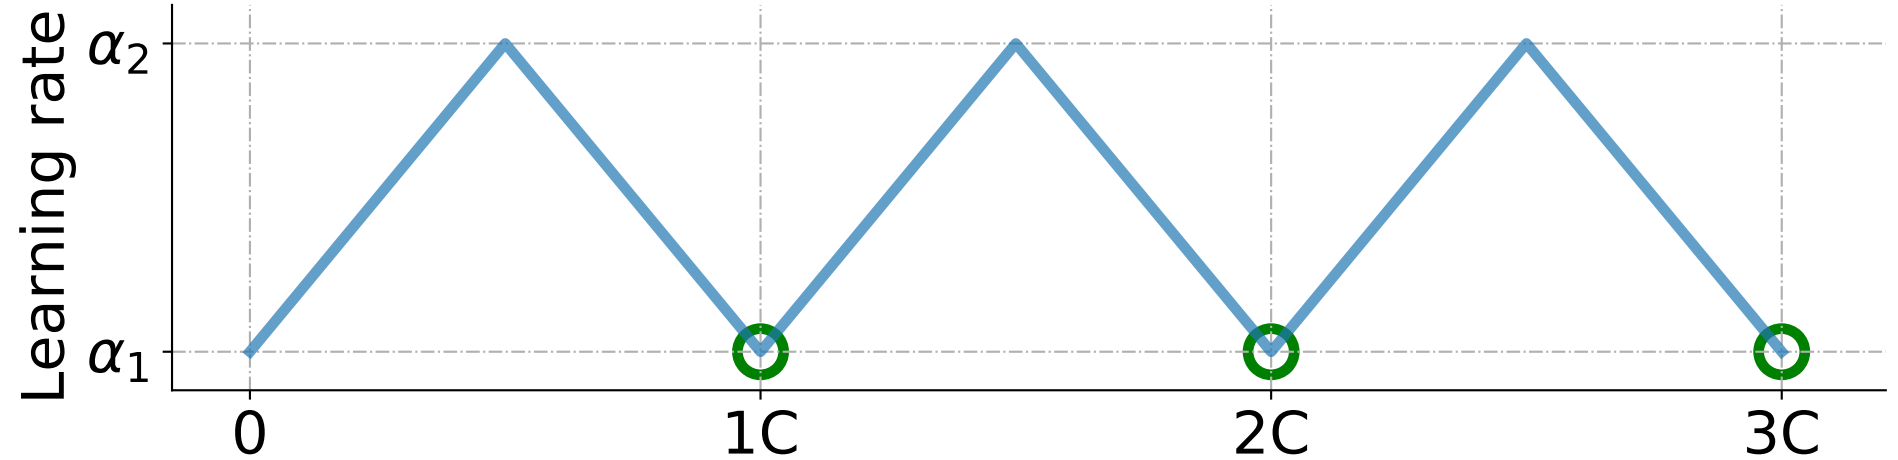

Supplement: supplementary_material [file attachment]

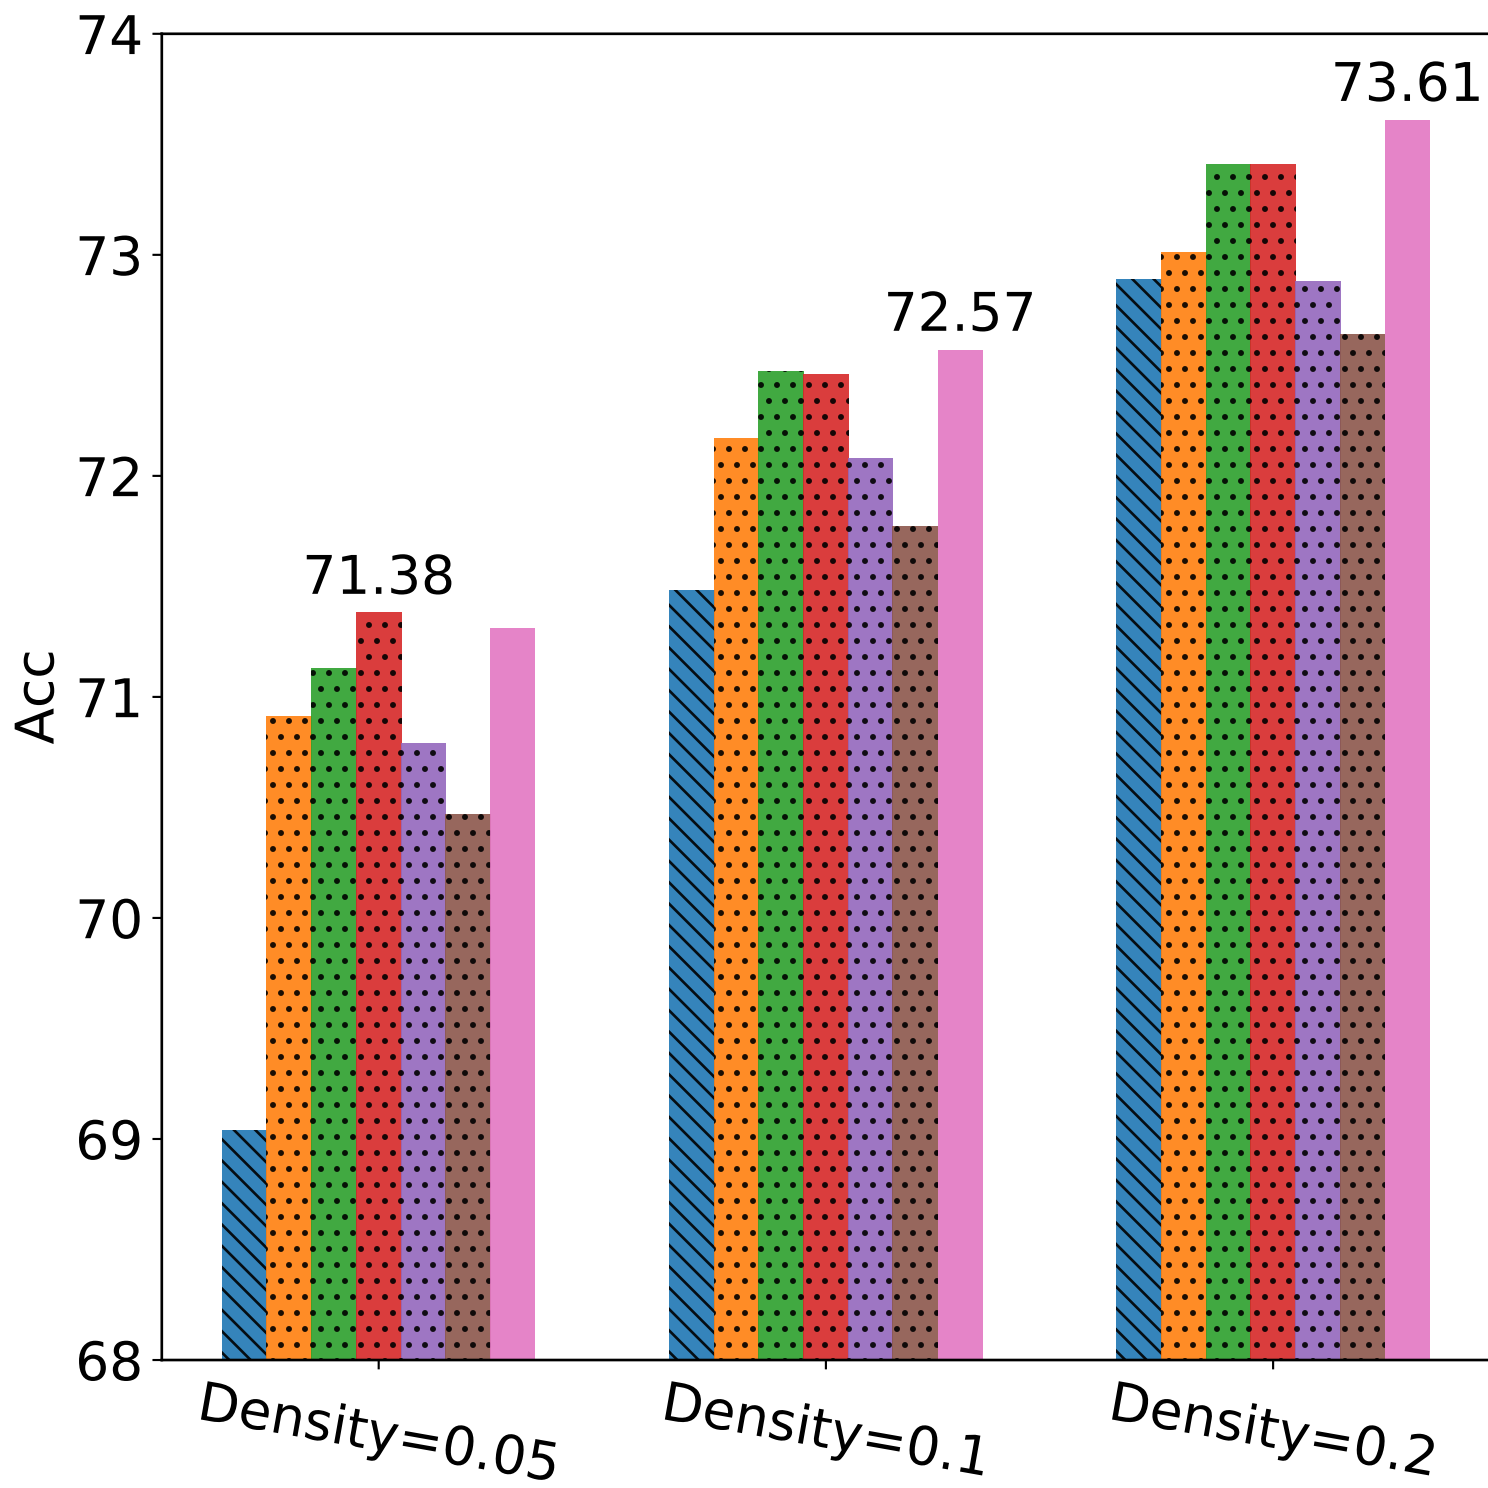

Supplement: supplementary_material [file attachment]

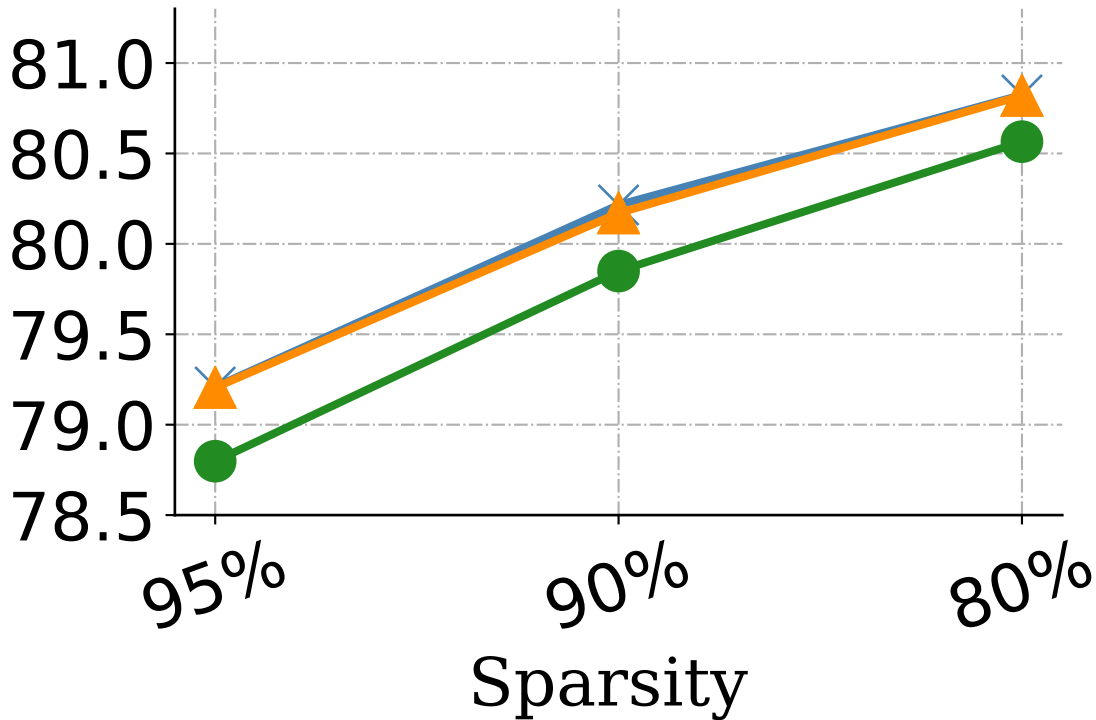

Supplement: supplementary_material [file attachment]

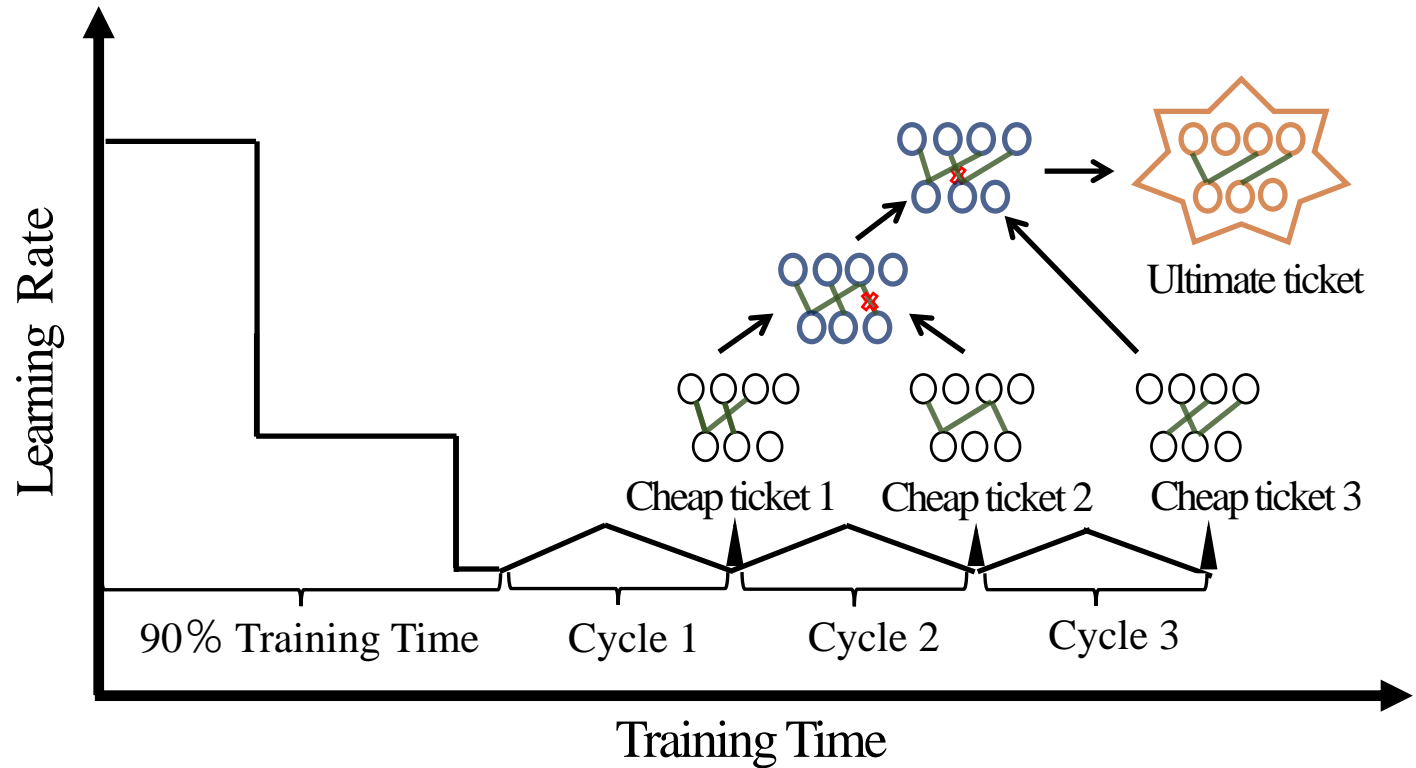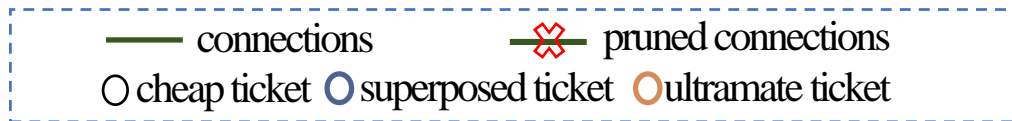

Supplement: supplementary_material [file attachment]
